# Supplementary material for: Stabilization of heterochromatin by CLOCK promotes stem cell rejuvenation and cartilage regeneration
Source: PubMed Central journal article supplement (PMC8027439; doi:10.1038/s41422-020-0385-7), 2020-07-31
Supplement: 41422_2020_385_MOESM1_ESM.pdf [file 41422_2020_385_MOESM1_ESM.pdf]

Figure S1

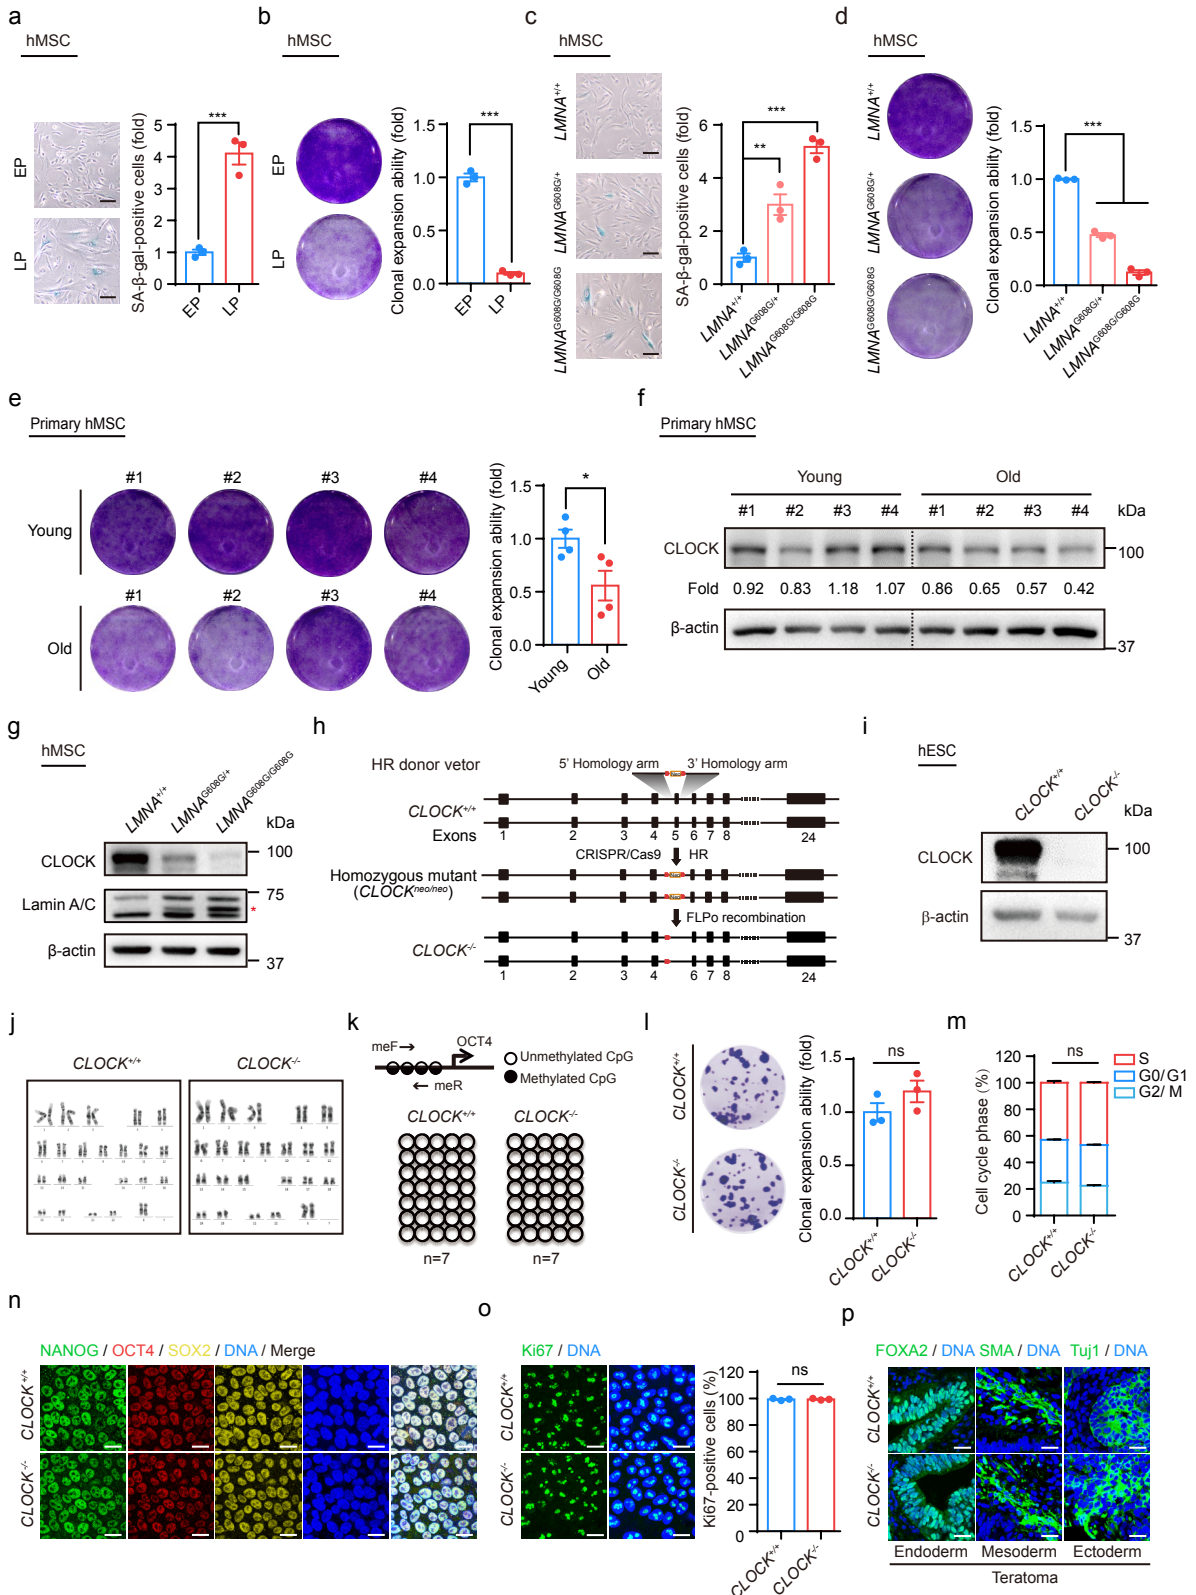

**Supplementary information, Fig. S1 Characterization of senescent hMSCs and generation of CLOCK-deficient hESCs.** **a** SA- $\beta$ -gal staining of EP (P4) and LP (P13) *CLOCK*<sup>+/+</sup> hMSCs. Data are presented as means  $\pm$  SEM.  $n = 3$  biological replicates. \*\*\* $p < 0.001$  (Two-tailed unpaired Student's  $t$ -test). Scale bars, 100  $\mu$ m. **b** Clonal expansion assay of EP (P4) and LP (P12) *CLOCK*<sup>+/+</sup> hMSCs. Data are presented as means  $\pm$  SEM.  $n = 3$  biological replicates. \*\*\* $p < 0.001$  (Two-tailed unpaired Student's  $t$ -test). **c** SA- $\beta$ -gal staining of HGPS-specific hMSCs. Data are presented as means  $\pm$  SEM.  $n = 3$  biological replicates. \*\* $p < 0.01$ ; \*\*\* $p < 0.001$  (Two-tailed unpaired Student's  $t$ -test). Scale bars, 100  $\mu$ m. **d** Clonal expansion assay of HGPS-specific hMSCs. Data are presented as means  $\pm$  SEM.  $n = 3$  biological replicates. \*\*\* $p < 0.001$  (Two-tailed unpaired Student's  $t$ -test). **e** Clonal expansion assay of primary hMSCs derived from young and old individuals. Data are presented as means  $\pm$  SEM.  $n = 4$  biological replicates. \* $p < 0.05$  (Two-tailed unpaired Student's  $t$ -test). **f** Representative image of western blot analysis of CLOCK in young and old human primary MSCs.  $\beta$ -actin was used as the loading control.  $n = 4$  biological replicates. **g** Representative image of western blot analysis of CLOCK in HGPS-specific (*LMNA*<sup>G608G/+</sup> and *LMNA*<sup>G608G/G608G</sup>) hMSCs.  $\beta$ -actin was used as the loading control. \* represents the band of progerin. **h** Schematic showing the gene editing strategy for *CLOCK* (exon 5) using CRISPR/Cas9-mediated HR in hESCs. **i** Western blot analysis of CLOCK in both *CLOCK*<sup>+/+</sup> and *CLOCK*<sup>-/-</sup> hESCs.  $\beta$ -actin was used as the loading control. Data are representative of three independent experiments. **j** G-banding karyotyping of *CLOCK*<sup>+/+</sup> and *CLOCK*<sup>-/-</sup> hESCs. **k** DNA methylation analysis at the *OCT4* promoter in *CLOCK*<sup>+/+</sup> and *CLOCK*<sup>-/-</sup> hESCs. **l** Clonal expansion assay of *CLOCK*<sup>+/+</sup> and *CLOCK*<sup>-/-</sup> hESCs. Data are presented as means  $\pm$  SEM.  $n = 3$  biological replicates. ns, nonsignificant (Two-tailed unpaired Student's  $t$ -test). **m** Cell cycle analysis of *CLOCK*<sup>+/+</sup> and *CLOCK*<sup>-/-</sup> hESCs. Data are presented as means  $\pm$  SEM.  $n = 3$  biological replicates. ns, nonsignificant (Two-tailed unpaired Student's  $t$ -test). **n** Immunofluorescence analysis of the pluripotency markers NANOG, OCT4, and SOX2 in *CLOCK*<sup>+/+</sup> and *CLOCK*<sup>-/-</sup> hESCs. Scale bars, 25  $\mu$ m. **o** Immunofluorescence analysis of Ki67 in *CLOCK*<sup>+/+</sup> and *CLOCK*<sup>-/-</sup> hESCs. Data are presented as means  $\pm$  SEM.  $n = 3$  biological replicates. ns, nonsignificant (Two-tailed unpaired Student's  $t$ -test). Scale bars, 25  $\mu$ m. **p** Immunofluorescence analysis of representative markers of the three germ layers in teratomas derived from *CLOCK*<sup>+/+</sup> and *CLOCK*<sup>-/-</sup> hESCs. Scale bars, 25  $\mu$ m.
