# Supplementary material for: Stabilization of heterochromatin by CLOCK promotes stem cell rejuvenation and cartilage regeneration
Source: PubMed Central journal article supplement (PMC8027439; doi:10.1038/s41422-020-0385-7), 2020-07-31
Supplement: 41422_2020_385_MOESM2_ESM.pdf [file 41422_2020_385_MOESM2_ESM.pdf]

Figure S2

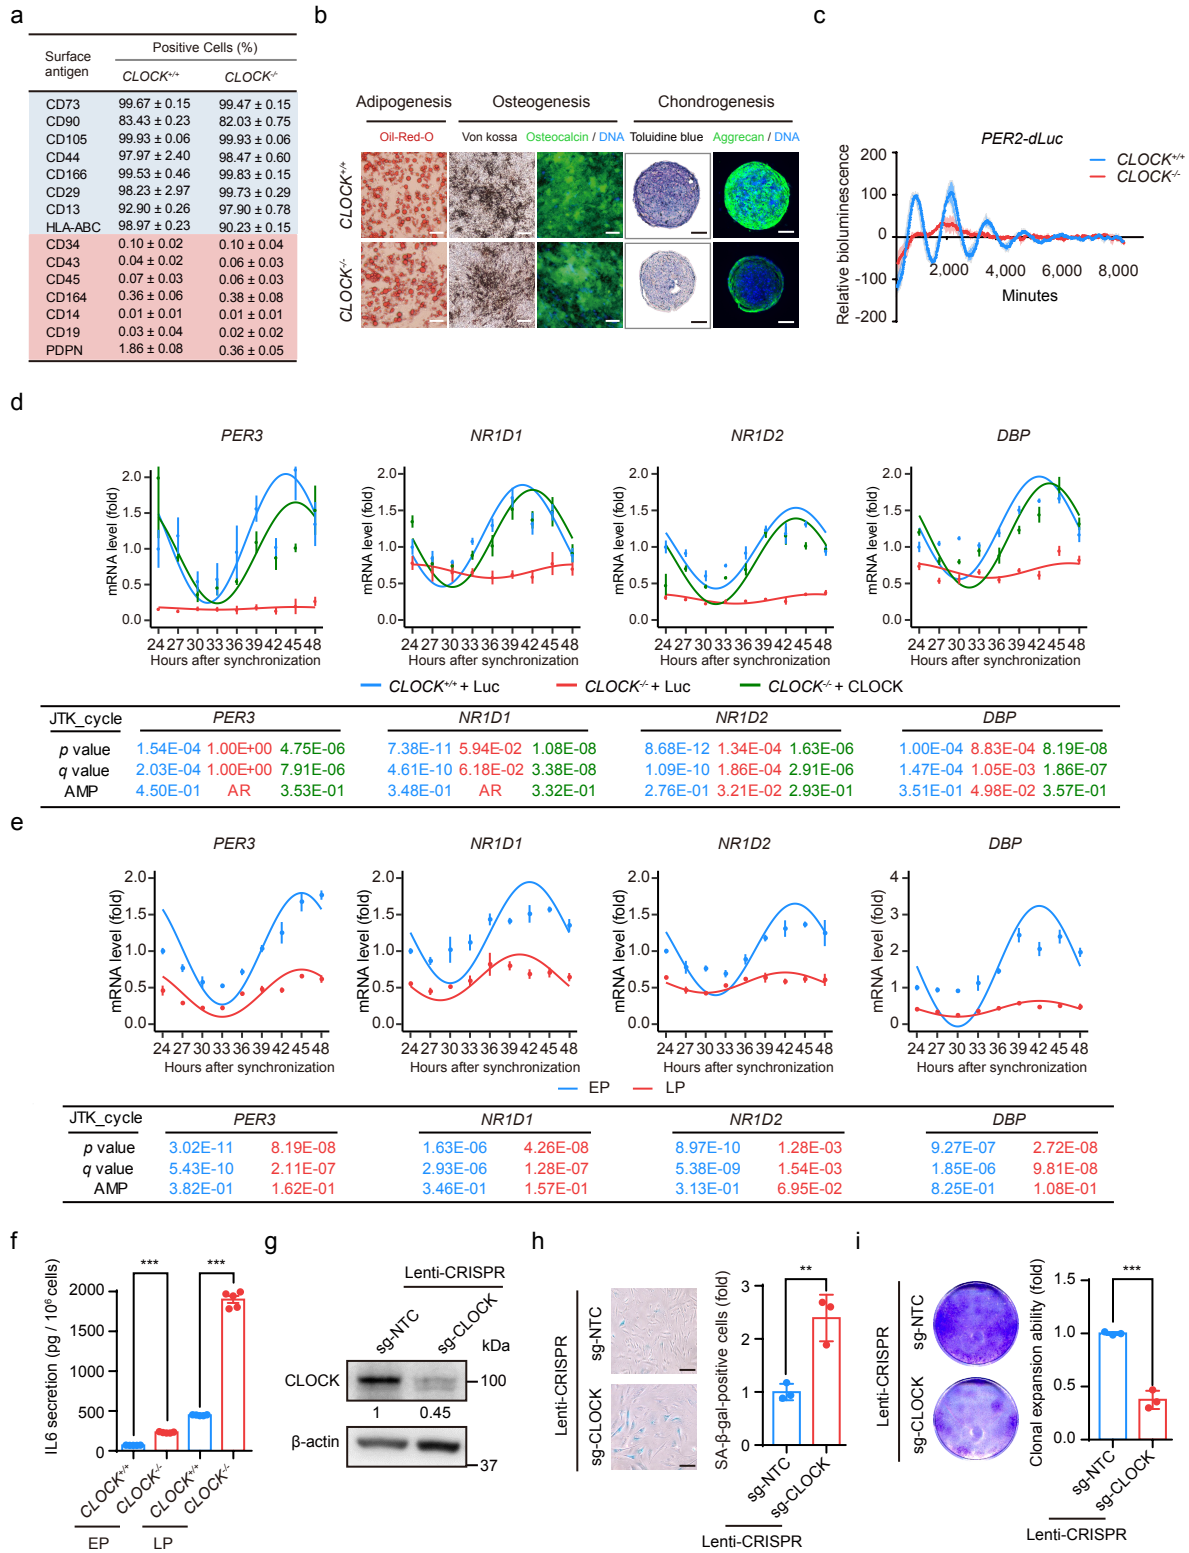

**Supplementary information, Fig. S2 Characterization of CLOCK-deficient hMSCs.**

**a** Surface antigen analysis of *CLOCK*<sup>+/+</sup> and *CLOCK*<sup>-/-</sup> hMSCs. Data are presented as means  $\pm$  SEM. *n* = 3 biological replicates. **b** Characterization of the multilineage differentiation potential of *CLOCK*<sup>+/+</sup> and *CLOCK*<sup>-/-</sup> hMSCs. Toluidine blue and Aggrecan staining were used to evaluate chondrogenesis. Von Kossa and Osteocalcin staining were used to evaluate osteogenesis. Oil Red O staining were used to evaluate adipogenesis. Scale bars, 100  $\mu$ m. **c** Representative traces of circadian oscillation in *CLOCK*<sup>+/+</sup> and *CLOCK*<sup>-/-</sup> hMSCs monitored by a transiently transfected reporter plasmid expressing destabilized Luc driven by the *PER2* gene promoter (*PER2-dLuc*). Continuous monitoring of Luc activity revealed significant amplitude dampening of *PER2::LUC* oscillations in *CLOCK*<sup>-/-</sup> hMSCs. Data are presented as means  $\pm$  SD. *n* = 3 biological replicates. **d** Relative mRNA levels of the indicated genes from forskolin-synchronized *CLOCK*<sup>+/+</sup> and *CLOCK*<sup>-/-</sup> hMSCs transduced with lentiviruses expressing Luc or CLOCK measured at the indicated time points. The qPCR data shown above were further analyzed by JTK\_Cycle analysis to determine the rhythmicity and amplitude of the peaks (Time course threads of *CLOCK*<sup>+/+</sup> or *CLOCK*<sup>-/-</sup> hMSCs with both *p* and *q* values < 0.05 were considered rhythmic). AR, arrhythmic. Data are presented as means  $\pm$  SD. *n* = 4. The solid fitted line represents a cosinor-fitted curve that indicates rhythmic expression. Data are representative of two independent experiments. **e** Relative mRNA levels of the indicated genes from forskolin-synchronized EP (P4) and LP (P13) *CLOCK*<sup>+/+</sup> hMSCs measured at the indicated time points. The RT-qPCR data shown above were further analyzed by JTK\_Cycle analysis to determine the rhythmicity and amplitude of the peaks (Time course threads of EP or LP hMSCs with both *p* and *q* values < 0.05 were considered rhythmic). AR, arrhythmic. Data are presented as means  $\pm$  SD. *n* = 4. The solid fitted line represents a cosinor-fitted curve that indicates rhythmic expression. Data are representative of two independent experiments. **f** ELISA of IL6 secretion in EP (P4) and LP (P9) *CLOCK*<sup>+/+</sup> and *CLOCK*<sup>-/-</sup> hMSCs. Data are presented as means  $\pm$  SEM. *n* = 5. \*\*\**p* < 0.001 (Two-tailed unpaired Student's *t*-test). **g** Western blot analysis of CLOCK in *CLOCK*<sup>+/+</sup> hMSCs transduced with lentivirus-CRISPRv2 targeting CLOCK or an NTC sgRNA.  $\beta$ -actin was used as the loading control. Data are representative of three independent experiments. NTC means non-targeting control. **h** SA- $\beta$ -gal staining in *CLOCK*<sup>+/+</sup> hMSCs transduced with lentivirus-CRISPRv2 targeting CLOCK or an NTC sgRNA. Data are presented as means  $\pm$  SEM. *n* = 3 biological replicates. \*\**p* < 0.01 (Two-tailed unpaired Student's *t*-test). Scale bars, 100  $\mu$ m. NTC means non-targeting control. **i** Clonal expansion assay of *CLOCK*<sup>+/+</sup> hMSCs transduced with lentivirus-CRISPRv2 targeting CLOCK or an NTC sgRNA. Data are presented as means  $\pm$  SEM. *n* = 3 biological replicates. \*\*\**p* < 0.001 (Two-tailed unpaired Student's *t*-test). NTC means non-targeting control.
