# Supplementary material for: Stabilization of heterochromatin by CLOCK promotes stem cell rejuvenation and cartilage regeneration
Source: PubMed Central journal article supplement (PMC8027439; doi:10.1038/s41422-020-0385-7), 2020-07-31
Supplement: 41422_2020_385_MOESM3_ESM.pdf [file 41422_2020_385_MOESM3_ESM.pdf]

Figure S3

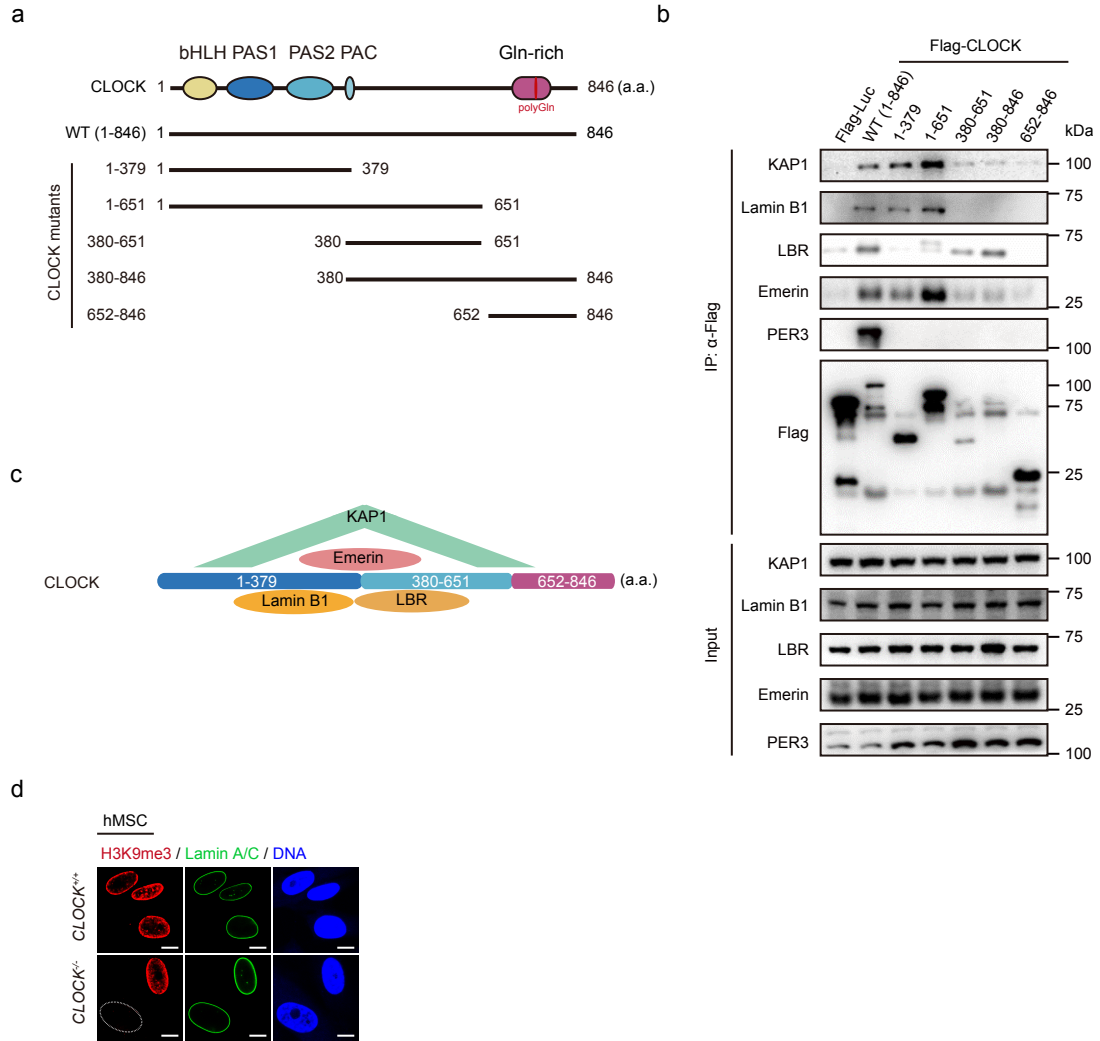

**Supplementary information, Fig. S3 Mapping of CLOCK domains interacting with nuclear lamina proteins and KAP1.** **a** Schematic diagram of different CLOCK truncations. **b** Co-IP of KAP1 and nuclear lamina proteins with exogenous full-length and truncated CLOCK proteins in HEK293T cells. Data are representative of two independent experiments. **c** Schematic diagram of a truncated CLOCK protein (a.a. 1-846) and the possible domains interacting with KAP1, LBR and Emerin according to the co-IP results shown in Supplementary information, Fig. S3b. **d** Representative images of H3K9me3 staining of late-passage *CLOCK*<sup>+/+</sup> and *CLOCK*<sup>-/-</sup> hMSCs (P9). Dashed lines indicate the nuclear boundaries of cells with decreased signal of H3K9me3. Related to Fig. 2f, g. Scale bars, 10  $\mu$ m.
