# Supplementary material for: Stabilization of heterochromatin by CLOCK promotes stem cell rejuvenation and cartilage regeneration
Source: PubMed Central journal article supplement (PMC8027439; doi:10.1038/s41422-020-0385-7), 2020-07-31
Supplement: 41422_2020_385_MOESM4_ESM.pdf [file 41422_2020_385_MOESM4_ESM.pdf]

Figure S4

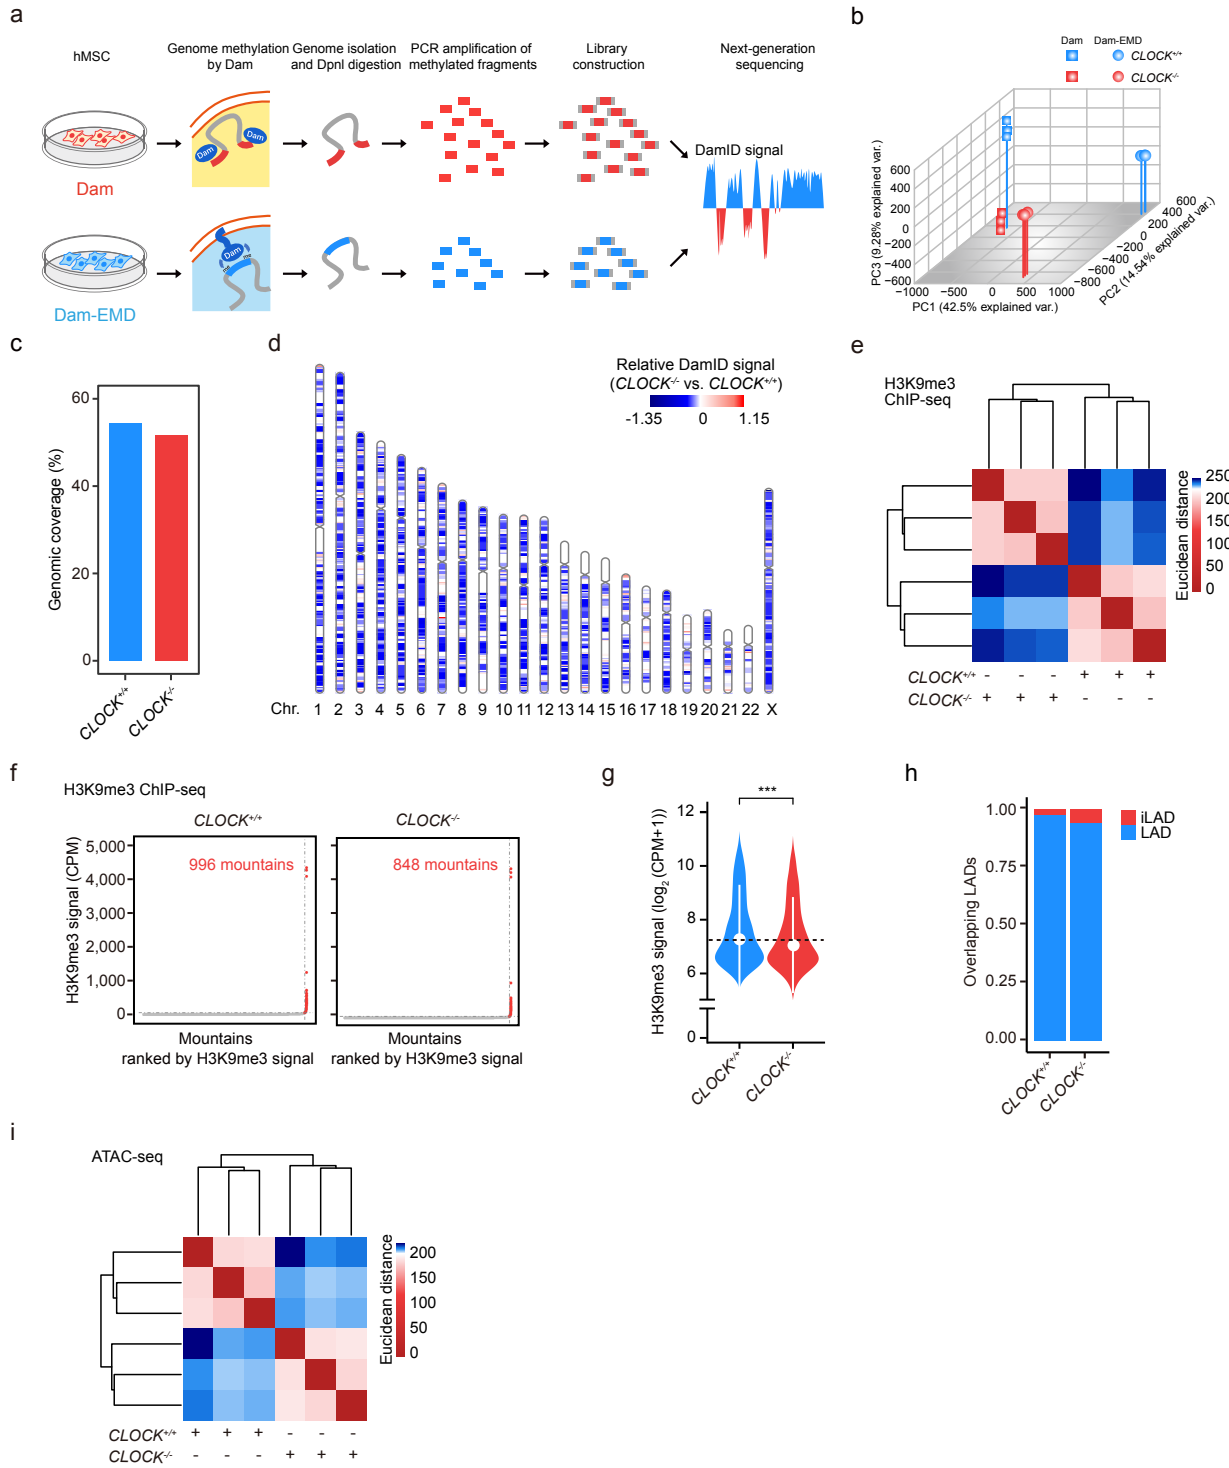

**Supplementary information, Fig. S4 Epigenomic analyses of *CLOCK*<sup>-/-</sup> hMSCs. a**

The flow chart of the DamID-seq strategy. **b** Principal component analysis to assess the reproducibility of DamID-seq data in late-passage *CLOCK*<sup>+/+</sup> and *CLOCK*<sup>-/-</sup> hMSCs (P9). **c** Bar chart showing the genomic coverage of LADs in late-passage *CLOCK*<sup>+/+</sup> and *CLOCK*<sup>-/-</sup> hMSCs (P9). **d** Chromosome ideogram showing the relative DamID signals at LAD regions of *CLOCK*<sup>-/-</sup> hMSCs compared to those of late-passage *CLOCK*<sup>+/+</sup> hMSCs (P9) across the 23 pairs of chromosomes. The color key from blue to red indicates low to high of the relative DamID signals at each LAD region, respectively. **e** Heatmap showing the Euclidean distance analysis to assess the reproducibility of H3K9me3 ChIP-seq data in late-passage *CLOCK*<sup>+/+</sup> and *CLOCK*<sup>-/-</sup> hMSCs (P9). The color key of the Euclidean distance from red to blue indicates strong to weak correlation, respectively. **f** Distribution of the H3K9me3 ChIP-seq signal at H3K9me3 peaks revealed two classes of H3K9me3 peaks in late-passage *CLOCK*<sup>+/+</sup> and *CLOCK*<sup>-/-</sup> hMSCs (P9). H3K9me3 peaks are plotted in increasing order based on the H3K9me3 signal. H3K9me3 mountains are defined as H3K9me3 peaks above the inflection points of the curves. **g** Violin plot showing the H3K9me3 signals at H3K9me3 mountains in late-passage *CLOCK*<sup>+/+</sup> and *CLOCK*<sup>-/-</sup> hMSCs (P9). The white circles represent the median values, and the white lines represent the values within the IQR from smallest to largest. \*\*\* $p < 0.001$  (Two-sided Wilcoxon rank-sum test). **h** Bar plot showing the percentages of H3K9me3 mountains located in LAD regions in late-passage *CLOCK*<sup>+/+</sup> and *CLOCK*<sup>-/-</sup> hMSCs (P9). **i** Heatmap showing the Euclidean distance analysis to determine the reproducibility of ATAC-seq data in late-passage *CLOCK*<sup>+/+</sup> and *CLOCK*<sup>-/-</sup> hMSCs (P9). The color key of the Euclidean distance from red to blue indicates strong to weak correlation, respectively.
