# Supplementary material for: Stabilization of heterochromatin by CLOCK promotes stem cell rejuvenation and cartilage regeneration
Source: PubMed Central journal article supplement (PMC8027439; doi:10.1038/s41422-020-0385-7), 2020-07-31
Supplement: 41422_2020_385_MOESM5_ESM.pdf [file 41422_2020_385_MOESM5_ESM.pdf]

Figure S5

a

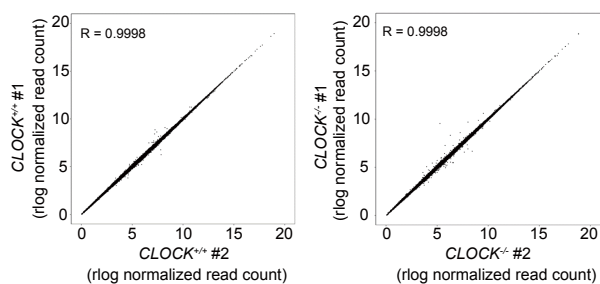

b

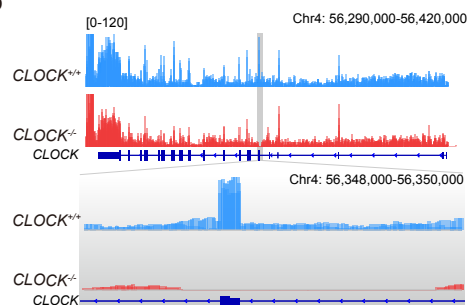

c

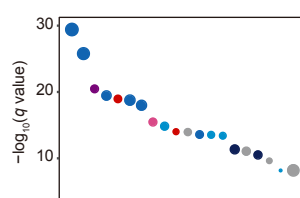

- GO terms
- Chromatin
  - Chromosome
  - Condensed chromosome
  - DNA packaging complex
  - Nucleosome
  - Protein-DNA complex
  - Others
- Hit count in query list
- 20
  - 40
  - 60
  - 80

d

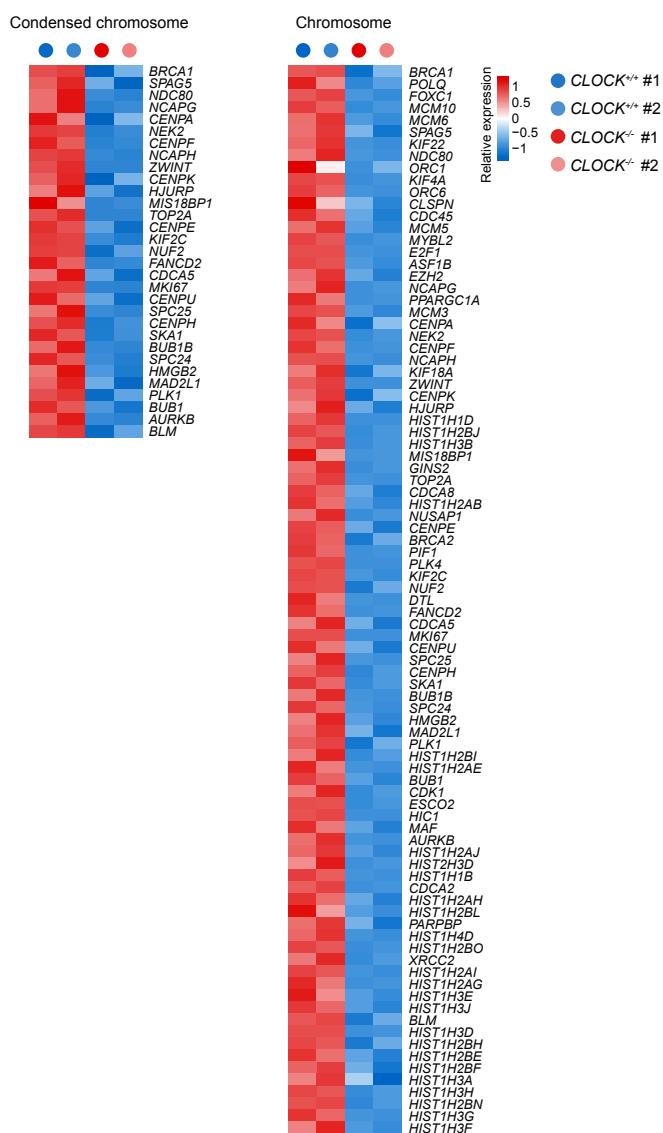

**Supplementary information, Fig. S5 RNA-seq analysis of *CLOCK*<sup>-/-</sup> hMSCs.** **a** Scatter plots showing the correlation between RNA-seq replicates from late-passage *CLOCK*<sup>+/+</sup> and *CLOCK*<sup>-/-</sup> hMSCs (P9). **b** Top, representative tracks showing the RNA level of *CLOCK* in late-passage *CLOCK*<sup>+/+</sup> and *CLOCK*<sup>-/-</sup> hMSCs (P9). Bottom, gene editing sites for *CLOCK* (exon 5) using CRISPR/Cas9-mediated HR with its flanking region zoomed. **c** Scatter plot showing the GO biological process terms enriched in downregulated genes in *CLOCK*<sup>-/-</sup> hMSCs compared to *CLOCK*<sup>+/+</sup> hMSCs at late-passage (P9). **d** Heatmap showing the Z-score normalized expression levels of genes associated with “Condensed chromatin” and “Chromosome” in *CLOCK*<sup>-/-</sup> hMSCs compared to *CLOCK*<sup>+/+</sup> hMSCs at late-passage (P9).
