# Supplementary material for: Stabilization of heterochromatin by CLOCK promotes stem cell rejuvenation and cartilage regeneration
Source: PubMed Central journal article supplement (PMC8027439; doi:10.1038/s41422-020-0385-7), 2020-07-31
Supplement: 41422_2020_385_MOESM6_ESM.pdf [file 41422_2020_385_MOESM6_ESM.pdf]

Figure S6

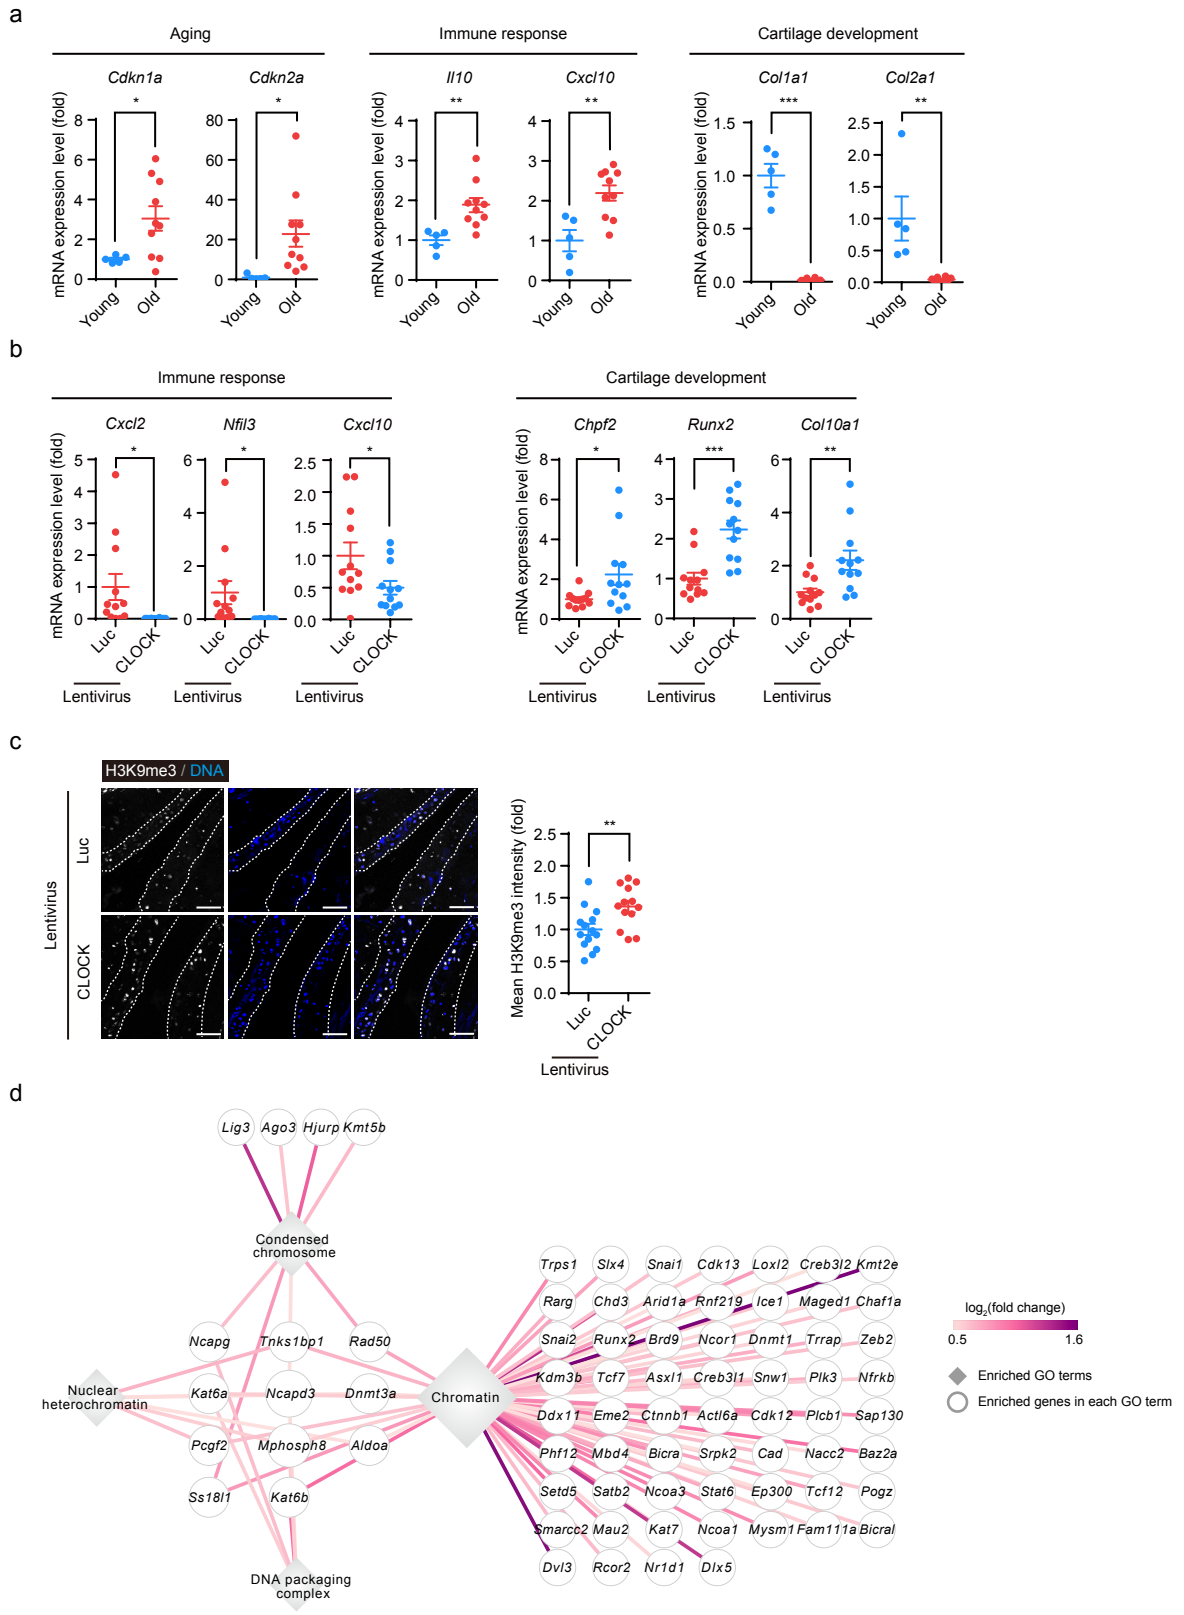

**Supplementary information, Fig. S6 CLOCK alleviates osteoarthritis of aged mice.** **a** RT-qPCR analysis of the indicated genes in the joints of young mice ( $n = 5$  mice) and old mice ( $n = 10$  mice). Data are presented as means  $\pm$  SEM.  $*p < 0.05$ ;  $**p < 0.01$ ;  $***p < 0.001$  (Two-tailed unpaired Student's  $t$ -test). **b** RT-qPCR analysis results of the indicated genes in the joints of aged mice injected with lentiviruses expressing Luc or CLOCK. Luc ( $n = 12$  mice), CLOCK ( $n = 12$  mice). Data are presented as means  $\pm$  SEM.  $*p < 0.05$ ;  $**p < 0.01$ ;  $***p < 0.001$  (Two-tailed unpaired Student's  $t$ -test). **c** H3K9me3 staining of articular cartilage from aged mice injected with lentiviruses expressing Luc ( $n = 14$  mice) or CLOCK ( $n = 13$  mice). Quantitative data to the right are presented as means  $\pm$  SEM. Dashed lines indicates the articular cartilage surface in the joints of aged mice injected with lentiviruses expressing Luc or CLOCK.  $**p < 0.01$  (Two-tailed unpaired Student's  $t$ -test). Scale bars, 50  $\mu$ m. **d** Network showing the expression levels for upregulated genes involved in "Condensed chromosome", "Nuclear heterochromatin", "DNA packaging complex" and "Chromatin" in the joints of aged mice injected with lentiviruses expressing CLOCK.
